# Supplementary material
Source: HighWire-hosted journal article supplement (http://molpharm.aspetjournals.org/highwire/filestream/76335/field_highwire_adjunct_files/3/10.1124_mol.104.005496_SUPP_TABLE_4.pdf)
Supplement: 10.1124_mol.104.005496_SUPP_TABLE_4.pdf [file 10.1124_mol.104.005496_SUPP_TABLE_4.pdf]

SUPPLEMENTAL TABLE 4

Gene expression altered by agonists of PPAR, RXR and LXR in mouse liver

Anderson SP, Dunn C, Laughter A, Yoon L, Swanson C, Stulnig TM, Steffensen KR, Chandraratna RAS, Gustafsson J-A, and Corton JC (2004)  
*Mol Pharmacol* doi:10.1124/mol.104.005496.

| Gene Name                     | Gene Description                                       | Accession # | Class | WY,<br>WT | WY,<br>Null | AGN,<br>WT | AGN,<br>Null | T1317,<br>WT | T1317,<br>Null | Con,<br>Null |
|-------------------------------|--------------------------------------------------------|-------------|-------|-----------|-------------|------------|--------------|--------------|----------------|--------------|
| <b>Apoptosis</b>              |                                                        |             |       |           |             |            |              |              |                |              |
| Birc5                         | baculoviral IAP repeat-containing 5                    | AB013819    | 3     |           |             | 5.84       |              |              |                |              |
| Capns1                        | calpain, small subunit 1                               | AF058298    | 3     |           |             | 1.6        |              |              |                |              |
| Clu                           | clusterin                                              | AV003873    | 5     |           |             |            | 1.62         |              |                |              |
| Cycs                          | cytochrome c, somatic                                  | X01756      | 1     | 1.5       |             |            |              |              |                |              |
| Pdcd5                         | programmed cell death 5                                | AA870917    | 1     | 1.59      |             |            |              |              |                |              |
| Pdcd6                         | programmed cell death 6                                | AV138382    | 5     |           |             |            | 1.55         |              |                |              |
| Perp-pending                  | p53 apoptosis effector related to Pmp22                | AI854029    | 1     | 1.66      |             |            |              |              |                |              |
| <b>Glutathione Metabolism</b> |                                                        |             |       |           |             |            |              |              |                |              |
| Gsr                           | glutathione reductase 1                                | AI851983    | 1     | 1.62      |             |            |              |              |                |              |
| Gsta2                         | glutathione S-transferase, alpha 2 (Yc2)               | J03958      | 4     |           |             | 2.29       | 1.67         |              | 2.4            | 2.2          |
| Gsta4                         | glutathione S-transferase, alpha 4                     | L06047      | 3     |           |             | 2.82       |              |              |                | 2.59         |
| Gstm2                         | glutathione S-transferase, mu 2                        | J04696      | 3     |           |             | 1.54       |              | 4.31         | 3.46           | 1.84         |
| Gstm3                         | glutathione S-transferase, mu 3                        | J03953      | 3     |           |             | 1.69       |              | 7.83         | 4.38           |              |
| Gstm5                         | glutathione S-transferase, mu 5                        | AA241764    | 7     |           | 1.53        |            |              |              |                | -1.62        |
| Gstt1                         | glutathione S-transferase, theta 1                     | X98055      | 5     |           |             |            | 1.61         |              |                |              |
| Gstt2                         | glutathione S-transferase, theta 2                     | X98056      | 6     | 2.31      |             | 1.7        | 1.52         | 2.2          |                |              |
| Mgst3                         | microsomal glutathione S-transferase 3                 | AI843448    | 2     | 2.78      |             | 3.25       |              |              |                | 2.67         |
| <b>Xenobiotic Metabolism</b>  |                                                        |             |       |           |             |            |              |              |                |              |
| Cyp1a2                        | cytochrome P450, family 1, subfamily a, polypeptide 2  | X04283      | 1     | -1.64     |             |            |              |              |                |              |
| Cyp2a4                        | cytochrome P450, family 2, subfamily a, polypeptide 4  | M19319      | 1     | -1.79     |             |            |              |              | 2.98           | 3.59         |
| Cyp2b10                       | cytochrome P450, family 2, subfamily b, polypeptide 10 | M21856      | 7     |           | -1.79       |            |              |              |                |              |
| Ephx1                         | epoxide hydrolase 1, microsomal                        | U89491      | 3     |           |             | 1.7        |              |              | 1.6            |              |
| Ephx2                         | epoxide hydrolase 2, cytoplasmic                       | Z37107      | 1     | 2.01      |             |            |              |              |                | -1.54        |
| Fmo5                          | flavin containing monooxygenase 5                      | U90535      | 7     |           | -1.62       |            |              |              |                |              |
| Por                           | P450 (cytochrome) oxidoreductase                       | D17571      | 7     |           | -1.52       |            |              | 4.74         |                |              |

| Gene Name                          | Gene Description                                                | Accession # | Class | WY,<br>WT | WY,<br>Null | AGN,<br>WT | AGN,<br>Null | T1317,<br>WT | T1317,<br>Null | Con,<br>Null |
|------------------------------------|-----------------------------------------------------------------|-------------|-------|-----------|-------------|------------|--------------|--------------|----------------|--------------|
| Por                                | P450 (cytochrome) oxidoreductase                                | AV140072    | 7     |           | -7.7        |            |              |              |                |              |
| Sult1a1                            | sulfotransferase family 1A, phenol-preferring, member 1         | L02331      | 1     | -2.05     |             |            |              |              |                |              |
| <b>Transport – Small Molecules</b> |                                                                 |             |       |           |             |            |              |              |                |              |
| Abcg2                              | ATP-binding cassette, sub-family G (WHITE), member 2            | AF103875    | 1     | 2.07      |             |            |              |              |                | -1.57        |
| Aqp8                               | aquaporin 8                                                     | AF018952    | 3     |           |             | 1.68       |              |              |                |              |
| Atp7a                              | ATPase, Cu <sup>++</sup> transporting, alpha polypeptide        | AI314990    | 1     | -1.97     |             |            |              |              |                |              |
| Slc22a1                            | solute carrier family 22 (organic cation transporter), member 1 | U38652      | 3     |           |             |            | -1.54        |              |                |              |
| Slc25a10                           | solute carrier family 25, member 10                             | AA683883    | 1     | 1.74      |             |            |              |              |                |              |
| Slc4a4                             | solute carrier family 4 (anion exchanger), member 4             | AF020195    | 5     |           |             |            | 1.61         |              |                |              |
| Ttr                                | transthyretin                                                   | D00073      | 1     | -1.57     |             |            |              |              |                |              |
| <b>Transport - Proteins</b>        |                                                                 |             |       |           |             |            |              |              |                |              |
| Kpna2                              | karyopherin (importin) alpha 2                                  | D55720      | 3     |           |             | 2.06       |              |              |                |              |
| P24b-pending                       | integral type I protein                                         | AW120643    | 1     | 1.7       |             |            |              |              |                |              |
| <b>Transport - Miscellaneous</b>   |                                                                 |             |       |           |             |            |              |              |                |              |
| Shbg                               | sex hormone binding globulin                                    | U85644      | 1     | 1.99      |             |            |              |              |                |              |
| 1110030N17Rik                      | RIKEN cDNA 1110030N17 gene                                      | AA690218    | 5     |           |             |            | -10          |              |                |              |
| Stx8                               | syntaxin 8                                                      | AF036716    | 1     | 1.94      |             |            |              |              |                |              |
| <b>Signalling</b>                  |                                                                 |             |       |           |             |            |              |              |                |              |
| 1300011C24Rik                      | RIKEN cDNA 1300011C24 gene                                      | AV248951    | 1     | -1.57     |             |            |              |              |                |              |
| Arl4                               | ADP-ribosylation-like 4                                         | Y12577      | 7     |           | -4.17       |            |              |              |                |              |
| Avpr1a                             | arginine vasopressin receptor 1A                                | D49730      | 5     |           |             |            |              | -1.64        |                |              |
| Clk                                | CDC-like kinase                                                 | M38381      | 7     |           | -1.64       |            |              |              |                |              |
| Ect2                               | ect2 oncogene                                                   | L11316      | 3     |           |             | 5.66       |              |              |                |              |
| Egfr                               | epidermal growth factor receptor                                | L06864      | 3     |           |             | -1.76      |              | -5.24        |                |              |
| Egfr                               | epidermal growth factor receptor                                | AW049716    | 2     | -3.23     |             | -2.39      |              | -5.96        |                |              |
| Egfr                               | epidermal growth factor receptor                                | AW049716    | 2     | -2.78     |             | -2.23      |              | -9.52        |                |              |
| Ghr                                | growth hormone receptor                                         | U15012      | 1     | -1.64     |             |            |              |              |                |              |
| Gnaq                               | guanine nucleotide binding protein, alpha q polypeptide         | M55412      | 1     | -3.71     |             |            |              |              |                |              |
| Igfbp2                             | insulin-like growth factor binding protein 2                    | X81580      | 3     |           |             | 1.6        |              |              |                | -1.89        |
| Igtp                               | interferon gamma induced GTPase                                 | U53219      | 1     | -1.59     |             |            |              |              |                |              |
| Mpp1                               | membrane protein, palmitoylated                                 | U38196      | 1     | 1.86      |             |            |              |              |                |              |
| Ogfr                               | opioid growth factor receptor                                   | AI838195    | 1     | -5.89     |             |            |              |              |                |              |
| Prlr                               | prolactin receptor                                              | M22957      | 1     | -1.59     |             |            |              |              |                |              |
| Ptpn5                              | protein tyrosine phosphatase, non-receptor type 5               | U28217      | 7     |           | 2.51        |            |              |              |                |              |

| Gene Name                               | Gene Description                                                                                                               | Accession # | Class | WY,<br>WT | WY,<br>Null | AGN,<br>WT | AGN,<br>Null | T1317,<br>WT | T1317,<br>Null | Con,<br>Null |
|-----------------------------------------|--------------------------------------------------------------------------------------------------------------------------------|-------------|-------|-----------|-------------|------------|--------------|--------------|----------------|--------------|
| Ptpns1                                  | protein tyrosine phosphatase, non-receptor type substrate 1                                                                    | AV317524    | 1     | 6.54      |             |            |              |              |                |              |
| Racgap1                                 | Rac GTPase-activating protein 1                                                                                                | AW122347    | 3     |           |             | 3.54       |              |              |                |              |
| S100a10                                 | S100 calcium binding protein A10 (calpactin)                                                                                   | M16465      | 1     | 1.5       |             |            |              |              |                |              |
| Tiam1                                   | T-cell lymphoma invasion and metastasis 1                                                                                      | AV331929    | 1     | 2.15      |             |            |              |              |                |              |
| Tnk2                                    | tyrosine kinase, non-receptor, 2                                                                                               | AF037260    | 5     |           |             |            | -3.34        |              |                |              |
| Tob1                                    | transducer of ErbB-2.1                                                                                                         | D78382      | 5     |           |             |            | 1.55         |              |                |              |
| Vegfa                                   | vascular endothelial growth factor A                                                                                           | M95200      | 5     |           |             |            | -1.76        |              |                |              |
| <b>Metabolism</b>                       |                                                                                                                                |             |       |           |             |            |              |              |                |              |
| <b>Amino Acid Metabolism</b>            |                                                                                                                                |             |       |           |             |            |              |              |                |              |
| Amd1                                    | S-adenosylmethionine decarboxylase 1                                                                                           | D12780      | 7     |           | 1.55        |            |              |              | -1.63          |              |
| Csad                                    | cysteine sulfinic acid decarboxylase                                                                                           | AW120896    | 1     | 2.82      |             |            |              | 2.26         |                |              |
| Oat                                     | ornithine aminotransferase                                                                                                     | X64837      | 3     |           |             | -1.52      |              |              |                |              |
| Vnn1                                    | vanin 1                                                                                                                        | AJ132098    | 2     | 8.09      |             | 1.71       |              |              |                | -4           |
| <b>Glycosylation</b>                    |                                                                                                                                |             |       |           |             |            |              |              |                |              |
| Galgt1                                  | UDP-N-acetyl-alpha-D-galactosamine:(N-acetylneuraminyl)-galactosylglucosylceramide-beta-1, 4-N-acetylgalactosaminyltransferase | U18975      | 7     |           | -2.18       |            |              |              |                |              |
| Gm2a                                    | GM2 ganglioside activator protein                                                                                              | U09816      | 3     |           |             | 1.88       |              |              |                | 2.19         |
| Gnpi                                    | glucosamine-6-phosphate deaminase                                                                                              | AW123396    | 5     |           |             |            | 1.5          |              |                |              |
| Mgat2                                   | mannoside acetylglucosaminyltransferase 2                                                                                      | A1117848    | 3     |           |             | -2.23      |              |              |                |              |
| Mpdu1                                   | mannose-P-dolichol utilization defect 1                                                                                        | AB024713    | 1     | 1.66      |             |            |              |              |                |              |
| Ugcg                                    | UDP-glucose ceramide glucosyltransferase                                                                                       | AI853172    | 1     | -2.57     |             |            |              |              |                |              |
| <b>Nucleotide/Nucleoside Metabolism</b> |                                                                                                                                |             |       |           |             |            |              |              |                |              |
| Entpd5                                  | ectonucleoside triphosphate diphosphohydrolase 5                                                                               | AJ238636    | 1     | 1.69      |             |            |              |              |                |              |
| Hprt                                    | hypoxanthine guanine phosphoribosyl transferase                                                                                | K01515      | 1     | 2.19      |             |            |              |              |                |              |
| Nme1                                    | expressed in non-metastatic cells 1, protein                                                                                   | AV216468    | 8     |           | 1.81        |            | 1.53         |              |                | -1.82        |
| Nudt1                                   | nudix (nucleoside diphosphate linked moiety X)-type motif 1                                                                    | D49956      | 1     | 1.51      |             |            |              |              |                |              |
| Tyms                                    | thymidylate synthase                                                                                                           | AU044050    | 3     |           |             | 1.93       |              |              |                |              |
| Umpk                                    | uridine monophosphate kinase                                                                                                   | L31783      | 1     | 1.99      |             |            |              |              |                |              |
| Upp                                     | uridine phosphorylase                                                                                                          | AV102624    | 5     |           |             |            | 1.59         |              |                |              |
| <b>Retinal/Retinol Metabolism</b>       |                                                                                                                                |             |       |           |             |            |              |              |                |              |
| Dhrs4                                   | dehydrogenase/reductase (SDR family) member 4                                                                                  | AW260761    | 1     | 2.28      |             |            |              |              |                | -1.67        |
| Rdh11                                   | retinol dehydrogenase 11                                                                                                       | AB030505    | 4     |           |             | 1.75       | 1.83         | 2.03         |                |              |
| Rdh11                                   | retinol dehydrogenase 11                                                                                                       | AB030505    | 5     |           |             |            | 1.96         |              |                | -1.59        |

| Gene Name                         | Gene Description                                       | Accession # | Class | WY,<br>WT | WY,<br>Null | AGN,<br>WT | AGN,<br>Null | T1317,<br>WT | T1317,<br>Null | Con,<br>Null |
|-----------------------------------|--------------------------------------------------------|-------------|-------|-----------|-------------|------------|--------------|--------------|----------------|--------------|
| Rdh5                              | retinol dehydrogenase 5                                | AF033195    | 1     | -10       |             |            |              |              |                |              |
| Rdh6                              | retinol dehydrogenase 6                                | AF030513    | 1     | 3.31      |             |            |              | 7.43         |                |              |
| <b>Steroid Metabolism</b>         |                                                        |             |       |           |             |            |              |              |                |              |
| Hsd11b1                           | hydroxysteroid 11-beta dehydrogenase 1                 | X83202      | 1     | -2.44     |             |            |              | -1.73        |                |              |
| Hsd17b11                          | hydroxysteroid (17-beta) dehydrogenase 11              | AA822174    | 1     | 4.17      |             |            |              | 1.89         |                | -2.33        |
| Hsd17b12                          | hydroxysteroid (17-beta) dehydrogenase 12              | AF064635    | 1     | 1.81      |             |            |              |              |                |              |
| Hsd3b2                            | hydroxysteroid dehydrogenase-2, delta<5>-3-beta        | M75886      | 2     | -2.5      |             | -2.64      |              | -3.99        |                |              |
| Hsd3b3                            | hydroxysteroid dehydrogenase-3, delta<5>-3-beta        | M77015      | 1     | 2.46      |             |            |              |              |                |              |
| Hsd3b5                            | hydroxysteroid dehydrogenase-5, delta<5>-3-beta        | L41519      | 2     | -2.09     |             | -2.57      |              | -36.66       |                |              |
| <b>Metabolism - Miscellaneous</b> |                                                        |             |       |           |             |            |              |              |                |              |
| 1110015E22Rik                     | RIKEN cDNA 1110015E22 gene                             | AW045753    | 1     | -1.89     |             |            |              |              |                |              |
| 2210023G05Rik                     | RIKEN cDNA 2210023G05 gene                             | AI181346    | 1     | -1.67     |             |            |              |              |                | 1.53         |
| 2310001A20Rik                     | RIKEN cDNA 2310001A20 gene                             | AI842715    | 1     | 3.69      |             |            |              |              |                |              |
| Alas2                             | aminolevulinic acid synthase 2, erythroid              | M15268      | 1     | -1.54     |             |            |              | -1.94        |                | 1.65         |
| Aldh1a7                           | aldehyde dehydrogenase family 1, subfamily A7          | U96401      | 3     |           |             | 1.62       |              |              |                |              |
| Car2                              | carbonic anhydrase 2                                   | M25944      | 1     | 2.55      |             |            |              |              |                |              |
| Ces1                              | carboxylesterase 1                                     | Y12887      | 4     |           |             | 3.12       | 2.73         |              |                |              |
| Ces3                              | carboxylesterase 3                                     | AW226939    | 1     | 1.53      |             |            |              | 2.57         | 1.53           |              |
| Cox6c                             | cytochrome c oxidase, subunit VIc                      | AV071102    | 9     | -1.67     | 1.94        |            | 1.78         |              |                | -2.44        |
| Cyp2c70                           | cytochrome P450, family 2, subfamily c, polypeptide 70 | AI047331    | 1     | -1.89     |             |            |              |              |                |              |
| Dio1                              | deiodinase, iodothyronine, type I                      | U49861      | 4     |           |             | -11.12     | -10          | -11.22       |                |              |
| Es1                               | esterase 1                                             | AF034435    | 1     | -1.82     |             |            |              |              |                | -1.52        |
| Galk1                             | galactokinase 1                                        | AB027012    | 1     | 2.23      |             |            |              | 2.06         |                |              |
| Gpd2                              | glycerol phosphate dehydrogenase 2, mitochondrial      | D50430      | 5     |           |             |            | -1.89        |              |                |              |
| Hmgcl                             | 3-hydroxy-3-methylglutaryl-Coenzyme A lyase            | AV371169    | 1     | 1.76      |             |            |              |              |                |              |
| Hmgcl                             | 3-hydroxy-3-methylglutaryl-Coenzyme A lyase            | U49878      | 1     | 1.74      |             |            |              |              |                |              |
| Idh2                              | isocitrate dehydrogenase 2 (NADP+), mitochondrial      | U51167      | 3     |           |             | 1.52       |              | 1.92         |                | 1.56         |
| Mod1                              | malic enzyme, supernatant                              | J02652      | 1     | 3.17      |             |            |              | 3.86         |                |              |
| Nnmt                              | nicotinamide N-methyltransferase                       | U86108      | 1     | -2.5      |             |            |              |              |                |              |
| Pck1                              | phosphoenolpyruvate carboxykinase 1, cytosolic         | AF009605    | 5     |           |             |            | -1.64        | -2.97        |                |              |
| Pfkfb1                            | 6-phosphofructo-2-kinase/fructose-2,6-biphosphatase 1  | X98848      | 1     | 6.12      |             |            |              |              |                |              |
| Qscn6                             | quiescin Q6                                            | AW123556    | 1     | -1.73     |             |            |              | -1.84        |                |              |
| Sdfr2                             | stromal cell derived factor receptor 2                 | D50464      | 1     | 1.58      |             |            |              |              |                |              |
| Spr                               | sepiapterin reductase                                  | AI530375    | 7     |           | -1.73       |            |              |              |                |              |

| Gene Name                              | Gene Description                                              | Accession # | Class | WY,<br>WT | WY,<br>Null | AGN,<br>WT | AGN,<br>Null | T1317,<br>WT | T1317,<br>Null | Con,<br>Null |
|----------------------------------------|---------------------------------------------------------------|-------------|-------|-----------|-------------|------------|--------------|--------------|----------------|--------------|
| Suclg1                                 | succinate-CoA ligase, GDP-forming, alpha subunit              | AI840979    | 1     | 1.55      |             |            |              |              |                |              |
| Temt                                   | thioether S-methyltransferase                                 | M88694      | 6     | 1.7       |             | 1.6        | 1.85         | 5.21         | 2.19           |              |
| <b>Chaperones/Protein Folding</b>      |                                                               |             |       |           |             |            |              |              |                |              |
| Cct3                                   | chaperonin subunit 3 (gamma)                                  | AV268209    | 1     | 1.5       |             |            |              |              |                |              |
| Dnaja1                                 | DnaJ (Hsp40) homolog, subfamily A, member 1                   | AF055664    | 3     |           |             | -1.76      |              |              |                |              |
| Dnajib11                               | DnaJ (Hsp40) homolog, subfamily B, member 11                  | AW122551    | 3     |           |             | -2.09      |              | -1.81        |                |              |
| Dnajc3                                 | DnaJ (Hsp40) homolog, subfamily C, member 3                   | U28423      | 3     |           |             | -1.52      |              |              |                |              |
| Hsp105                                 | heat shock protein                                            | L40406      | 3     |           |             | -1.97      |              |              |                |              |
| Hspa5                                  | heat shock 70kD protein 5 (glucose-regulated protein)         | AJ002387    | 3     |           |             | -1.7       |              | -1.83        |                | -1.52        |
| Hspca                                  | heat shock protein 1, alpha                                   | J04633      | 1     | 1.64      |             |            |              |              |                |              |
| Hspe1                                  | heat shock protein 1 (chaperonin 10)                          | U09659      | 1     | 1.77      |             |            |              |              |                |              |
| P5-pending                             | protein disulfide isomerase-related protein                   | AW045202    | 3     |           |             | -1.54      |              | -2.44        |                |              |
| P5-pending                             | protein disulfide isomerase-related protein                   | AW045202    | 3     |           |             | -1.57      |              | -2.66        |                |              |
| <b>Proteolysis</b>                     |                                                               |             |       |           |             |            |              |              |                |              |
| AW413091                               | expressed sequence AW413091                                   | AI118358    | 1     | -1.54     |             |            |              |              |                |              |
| Ctse                                   | cathepsin E                                                   | AJ009840    | 2     | 4.5       |             | 3.2        |              |              |                | -2.57        |
| Ela1                                   | elastase 1, pancreatic                                        | M27347      | 6     | -1.93     |             | -1.79      | -1.79        | -2.81        |                |              |
| Enpep                                  | glutamyl aminopeptidase                                       | M29961      | 1     | -1.62     |             |            |              |              |                |              |
| Hgfac                                  | hepatocyte growth factor activator                            | AI042655    | 1     | -1.79     |             |            |              |              |                |              |
| Itih1                                  | inter-alpha trypsin inhibitor, heavy chain 1                  | X70391      | 1     | -1.59     |             |            |              | -1.73        |                |              |
| Itih4                                  | inter alpha-trypsin inhibitor, heavy chain 4                  | AF023919    | 1     | -2.23     |             |            |              | -2.34        |                |              |
| Mug2                                   | murinoglobulin 2                                              | M65238      | 1     | -1.57     |             |            |              | -1.7         |                |              |
| Prss8                                  | protease, serine, 8 (prostasin)                               | AA760364    | 1     | 14.19     |             |            |              |              |                |              |
| Ren1                                   | renin 1 structural                                            | M32352      | 7     |           | -5          |            |              |              |                |              |
| Serpina3k                              | serine (or cysteine) proteinase inhibitor, clade A, member 3K | D00725      | 2     | -2        |             | -2.23      |              | -8.07        |                |              |
| Serpina3m                              | serine (or cysteine) proteinase inhibitor, clade A, member 3M | X69832      | 1     | -2.71     |             |            |              |              |                |              |
| <b>Ubiquitin-dependent Proteolysis</b> |                                                               |             |       |           |             |            |              |              |                |              |
| Psm7                                   | proteasome (prosome, macropain) subunit, alpha type 7         | AI836676    | 1     | 1.52      |             |            |              | 1.51         |                |              |
| Psm7                                   | proteasome (prosome, macropain) subunit, beta type 7          | D85570      | 1     | 1.52      |             |            |              |              |                |              |
| Psm14                                  | proteasome (prosome, macropain) 26S subunit, non-ATPase, 14   | Y13071      | 1     | 1.58      |             |            |              |              |                |              |
| Psm4                                   | proteasome (prosome, macropain) 26S subunit, non-ATPase, 4    | AF013099    | 1     | 1.54      |             |            |              |              |                |              |
| Usp15                                  | ubiquitin specific protease 15                                | AV359471    | 8     |           | 1.69        |            | 1.53         |              |                | -1.76        |
| <b>Protein Synthesis</b>               |                                                               |             |       |           |             |            |              |              |                |              |
| 1500002I10Rik                          | RIKEN cDNA 1500002I10 gene                                    | AW120679    | 1     | 1.51      |             |            |              |              |                |              |

| Gene Name                    | Gene Description                                                                                                                                                                        | Accession # | Class | WY,<br>WT | WY,<br>Null | AGN,<br>WT | AGN,<br>Null | T1317,<br>WT | T1317,<br>Null | Con,<br>Null |
|------------------------------|-----------------------------------------------------------------------------------------------------------------------------------------------------------------------------------------|-------------|-------|-----------|-------------|------------|--------------|--------------|----------------|--------------|
| Arl6ip                       | ADP-ribosylation-like factor 6 interacting protein                                                                                                                                      | AW122878    | 3     |           |             | 1.53       |              |              |                |              |
| D11Ert175e                   | DNA segment, Chr 11, ERATO Doi 175, expressed                                                                                                                                           | AW121031    | 1     | 2.32      |             |            |              |              |                |              |
| D5Wsu45e                     | DNA segment, Chr 5, Wayne State University 45, expressed                                                                                                                                | AV317706    | 5     |           |             |            | -3.85        |              |                |              |
| Rpl22                        | ribosomal protein L22                                                                                                                                                                   | AI853960    | 1     | 3.78      |             |            |              |              |                |              |
| <b>Structural Proteins</b>   |                                                                                                                                                                                         |             |       |           |             |            |              |              |                |              |
| Actg                         | actin, gamma, cytoplasmic                                                                                                                                                               | M21495      | 1     | 1.53      |             |            |              |              |                | -1.62        |
| Catna2                       | catenin alpha 2                                                                                                                                                                         | D25282      | 3     |           |             | -1.67      |              |              |                |              |
| Ckap2                        | cytoskeleton associated protein 2                                                                                                                                                       | AI121796    | 3     |           |             | 10.98      |              |              |                |              |
| Tbca                         | tubulin cofactor a                                                                                                                                                                      | U05333      | 1     | 1.53      |             |            |              |              |                |              |
| Tuba1                        | tubulin, alpha 1                                                                                                                                                                        | M28729      | 5     |           |             |            | -1.62        |              |                |              |
| Tubb2                        | tubulin, beta 2                                                                                                                                                                         | M28739      | 4     |           |             | -1.7       | -2.86        |              |                | -1.97        |
| <b>Transcription Factors</b> |                                                                                                                                                                                         |             |       |           |             |            |              |              |                |              |
| 2610209L14Rik                | RIKEN cDNA 2610209L14 gene                                                                                                                                                              | AI842968    | 5     |           |             |            | 1.6          |              |                |              |
| Atf5                         | activating transcription factor 5                                                                                                                                                       | AB012276    | 1     | -1.76     |             |            |              |              |                |              |
| Crnk11                       | Crn, crooked neck-like 1 (Drosophila)                                                                                                                                                   | AA216808    | 1     | 5.18      |             |            |              |              |                |              |
| Dbp                          | D site albumin promoter binding protein                                                                                                                                                 | AW047343    | 5     |           |             |            | 12.4         |              |                | 3.5          |
| Dmtf1                        | cyclin D binding myb-like transcription factor 1                                                                                                                                        | U70017      | 1     | 4.84      |             |            |              |              |                |              |
| Foxa2                        | forkhead box A2                                                                                                                                                                         | L10409      | 7     |           | -4          |            |              |              |                |              |
| Foxq1                        | forkhead box Q1                                                                                                                                                                         | AF010405    | 3     |           |             | 12.18      |              |              |                | 6.86         |
| Idb2                         | inhibitor of DNA binding 2                                                                                                                                                              | AF077861    | 1     | -1.57     |             |            |              |              |                | 1.57         |
| Polr2i                       | polymerase (RNA) II (DNA directed) polypeptide I                                                                                                                                        | AI852210    | 1     | 5.64      |             |            |              |              |                |              |
| Tcf3                         | transcription factor 3                                                                                                                                                                  | AI841235    | 7     |           | -2.57       |            |              |              |                |              |
| Tgfb1i4                      | transforming growth factor beta 1 induced transcript 4                                                                                                                                  | X62940      | 3     |           |             | -1.86      |              | -3.05        |                |              |
| <b>Miscellaneous Genes</b>   |                                                                                                                                                                                         |             |       |           |             |            |              |              |                |              |
|                              | clone MGC:58837 IMAGE:6773943, mRNA, complete cds                                                                                                                                       | AI852363    | 1     | 1.76      |             |            |              | 1.51         |                |              |
|                              |                                                                                                                                                                                         | Y10221      | 2     | 1.94      |             | 1.68       |              |              |                |              |
|                              |                                                                                                                                                                                         | X16678      | 2     | -1.82     |             | -1.82      |              |              |                |              |
|                              | Mus musculus 4 days neonate male adipose cDNA, RIKEN full-length enriched library, clone:B430101C18 product:HYPOTHETICAL 19.9 KDA PROTEIN homolog [Homo sapiens], full insert sequence. | AA790056    | 5     |           |             |            | -2.05        |              |                |              |
|                              |                                                                                                                                                                                         | M26005      | 3     |           |             | 1.87       |              |              |                |              |
|                              | Mus musculus Brf2 gene, 3' UTR                                                                                                                                                          | AA960603    | 7     |           | -1.7        |            |              |              |                |              |
|                              |                                                                                                                                                                                         | AV337823    | 1     | -2.57     |             |            |              |              |                |              |
|                              |                                                                                                                                                                                         | AV032952    | 1     | 1.56      |             |            |              |              |                |              |
|                              | Highly similar to 2118318A promyelocyte leukemia Zn finger protein                                                                                                                      | AI553024    | 5     |           |             |            | -4.77        |              |                |              |

| Gene Name     | Gene Description                                                                                       | Accession # | Class | WY,<br>WT | WY,<br>Null | AGN,<br>WT | AGN,<br>Null | T1317,<br>WT | T1317,<br>Null | Con, Null |
|---------------|--------------------------------------------------------------------------------------------------------|-------------|-------|-----------|-------------|------------|--------------|--------------|----------------|-----------|
|               | ESTs                                                                                                   | AA739024    | 7     |           | 3.02        |            |              |              |                |           |
|               |                                                                                                        | U02995      | 3     |           |             | -1.57      |              |              |                |           |
|               |                                                                                                        | M17327      | 1     | -1.59     |             |            |              |              |                |           |
|               | ESTs                                                                                                   | AA399835    | 5     |           |             |            | 2.54         |              |                |           |
|               |                                                                                                        | X16217      | 1     | -1.62     |             |            |              |              |                |           |
|               | Mus musculus, Similar to RIKEN cDNA 2010000G05 gene, clone MGC:58839 IMAGE:6773974, mRNA, complete cds | AW123567    | 2     | 5.45      |             | 4.75       |              |              |                | -6.25     |
|               | Mus musculus, Similar to RIKEN cDNA 2010000G05 gene, clone MGC:58839 IMAGE:6773974, mRNA, complete cds | AW123567    | 2     | 3.58      |             | 3.19       |              |              |                | -3.71     |
|               | ESTs                                                                                                   | A1647548    | 2     | 5.89      |             | 3.91       |              |              |                | -50       |
|               | ESTs                                                                                                   | C77554      | 1     | 2.36      |             |            |              |              |                |           |
| 0610039N19Rik | RIKEN cDNA 0610039N19 gene                                                                             | AW047688    | 2     | 5.51      |             | 1.97       |              | 2.77         |                | -2.64     |
| 1110018B13Rik | RIKEN cDNA 1110018B13 gene                                                                             | A1846452    | 1     | 1.54      |             |            |              |              |                |           |
| 1110029F20Rik | RIKEN cDNA 1110029F20 gene                                                                             | AW125508    | 5     |           |             |            | -1.86        | -1.61        |                |           |
| 1110030L07Rik | RIKEN cDNA 1110030L07 gene                                                                             | AW047363    | 1     | 1.74      |             |            |              |              |                |           |
| 1110032N12Rik | RIKEN cDNA 1110032N12 gene                                                                             | AW125827    | 5     |           |             |            | -1.54        |              |                |           |
| 1600024A01Rik | RIKEN cDNA 1600024A01 gene                                                                             | AA693125    | 1     | -1.82     |             |            |              |              |                |           |
| 1700025B16Rik | RIKEN cDNA 1700025B16 gene                                                                             | A1503987    | 1     | 4.56      |             |            |              |              |                |           |
| 1810014L12Rik | RIKEN cDNA 1810014L12 gene                                                                             | A1852985    | 5     |           |             |            | 1.56         |              |                |           |
| 1810073K19Rik | RIKEN cDNA 1810073K19 gene                                                                             | A1255961    | 1     | -2.13     |             |            |              |              |                |           |
| 2210409B01Rik | RIKEN cDNA 2210409B01 gene                                                                             | AF109906    | 7     |           | 1.54        |            |              |              |                | -1.62     |
| 2210409B22Rik | RIKEN cDNA 2210409B22 gene                                                                             | A1840191    | 5     |           |             |            | -3.34        |              |                |           |
| 2310016A09Rik | RIKEN cDNA 2310016A09 gene                                                                             | AW049373    | 1     | 1.61      |             |            |              |              |                |           |
| 2310016E22Rik | RIKEN cDNA 2310016E22 gene                                                                             | AW120882    | 1     | -2        |             |            |              |              |                |           |
| 2310035M22Rik | RIKEN cDNA 2310035M22 gene                                                                             | A1851230    | 3     |           |             | 3.77       |              |              |                |           |
| 2310042E05Rik | RIKEN cDNA 2310042E05 gene                                                                             | A1839731    | 7     |           | -5          |            |              |              |                | 4.89      |
| 2310074E22Rik | RIKEN cDNA 2310074E22 gene                                                                             | AW125119    | 1     | 1.98      |             |            |              |              |                |           |
| 2500002L14Rik | RIKEN cDNA 2500002L14 gene                                                                             | AW061255    | 1     | 1.54      |             |            |              |              |                |           |
| 2600017J23Rik | RIKEN cDNA 2600017J23 gene                                                                             | AW125505    | 1     | -1.67     |             |            |              |              |                | 1.52      |
| 2610201A12Rik | RIKEN cDNA 2610201A12 gene                                                                             | AA275196    | 3     |           |             | 6.86       |              |              |                |           |
| 2700094K13Rik | RIKEN cDNA 2700094K13 gene                                                                             | AW045665    | 3     |           |             | 1.59       |              |              |                |           |
| 2810428I15Rik | RIKEN cDNA 2810428I15 gene                                                                             | A1854550    | 8     |           | -9.1        |            | -7.7         |              |                | 7.72      |
| 2810449C13Rik | RIKEN cDNA 2810449C13 gene                                                                             | AW124926    | 1     | 3.94      |             |            |              |              |                |           |
| 2900037I21Rik | RIKEN cDNA 2900037I21 gene                                                                             | AW123269    | 3     |           |             | 4          |              |              |                |           |
| 3110038L01Rik | RIKEN cDNA 3110038L01 gene                                                                             | A1844396    | 5     |           |             |            | 1.56         |              |                |           |

| Gene Name     | Gene Description                                          | Accession # | Class | WY,<br>WT | WY,<br>Null | AGN,<br>WT | AGN,<br>Null | T1317,<br>WT | T1317,<br>Null | Con, Null |
|---------------|-----------------------------------------------------------|-------------|-------|-----------|-------------|------------|--------------|--------------|----------------|-----------|
| 3300001G02Rik | RIKEN cDNA 3300001G02 gene                                | AI843157    | 3     |           |             | 1.75       |              |              |                |           |
| 4922501H04Rik | RIKEN cDNA 4922501H04 gene                                | AI836718    | 1     | 1.65      |             |            |              |              |                |           |
| 4930529O08Rik | RIKEN cDNA 4930529O08 gene                                | AW061024    | 1     | 1.58      |             |            |              |              |                |           |
| 4931406C07Rik | RIKEN cDNA 4931406C07 gene                                | AI255972    | 1     | 1.77      |             |            |              |              |                |           |
| 4931406C07Rik | RIKEN cDNA 4931406C07 gene                                | AI255972    | 1     | 1.72      |             |            |              |              |                |           |
| 5730469M10Rik | RIKEN cDNA 5730469M10 gene                                | AI850090    | 2     | 2.73      |             | 1.99       |              |              |                |           |
| 5830471E12Rik | RIKEN cDNA 5830471E12 gene                                | AW124334    | 7     |           | -2.09       |            |              |              |                |           |
| 9430099J10Rik | RIKEN cDNA 9430099J10 gene                                | AI846811    | 3     |           |             | 1.5        |              |              |                |           |
| A030007L17Rik | RIKEN cDNA A030007L17 gene                                | AI854331    | 1     | 2.79      |             |            |              |              |                |           |
| AA408140      | expressed sequence AA408140                               | AA683712    | 7     |           | -5.56       |            |              |              |                | 7.16      |
| AI194696      | expressed sequence AI194696                               | M29008      | 1     | -1.86     |             |            |              | -1.53        |                |           |
| AI255964      | expressed sequence AI255964                               | AI528149    | 1     | -1.57     |             |            |              |              |                |           |
| AI463102      | EST AI463102                                              | AI851573    | 7     |           | -2.95       |            |              |              |                |           |
| AI876593      | expressed sequence AI876593                               | AI173533    | 1     | -1.93     |             |            |              |              |                |           |
| Ap2a2         | adaptor protein complex AP-2, alpha 2 subunit             | AW122807    | 7     |           | -1.7        |            |              |              |                |           |
| Armet         | arginine-rich, mutated in early stage tumors              | AW122364    | 1     | 1.62      |             | -2.05      |              | -2.14        |                |           |
| Atpi          | ATPase inhibitor                                          | AF002718    | 6     | 1.72      |             | 2.04       | 1.6          |              |                |           |
| Bcl6          | B-cell leukemia/lymphoma 6                                | U41465      | 3     |           |             | -4.35      |              | -3.99        |                |           |
| Cd9           | CD9 antigen                                               | L08115      | 3     |           |             | 1.58       |              |              |                |           |
| Clecsf13      | C-type lectin, superfamily member 13                      | D88577      | 3     |           |             | -2.18      |              |              |                |           |
| Cml1          | camello-like 1                                            | AI840501    | 1     | -1.64     |             |            |              | -2.46        |                |           |
| Cops6         | COP9 (constitutive photomorphogenic) homolog, subunit 6   | AF071315    | 1     | 1.84      |             |            |              |              |                |           |
| Cryz          | crystallin, zeta                                          | D78646      | 3     |           |             | 1.51       |              |              |                |           |
| D5Ert593e     | DNA segment, Chr 5, ERATO Doi 593, expressed              | AW124049    | 5     |           |             |            | 1.64         |              |                |           |
| D7Wsu128e     | DNA segment, Chr 7, Wayne State University 128, expressed | AA388099    | 1     | 1.58      |             |            |              |              |                |           |
| E430024D12    | hypothetical protein E430024D12                           | AA200748    | 1     | 4.76      |             |            |              |              |                |           |
| F5            | coagulation factor V                                      | U52925      | 1     | -1.59     |             |            |              |              |                |           |
| G7e-pending   | G7e protein                                               | U69488      | 4     |           |             | 10.11      | 3.48         |              |                |           |
| Gpld1         | glycosylphosphatidylinositol specific phospholipase D1    | AF050666    | 1     | -1.67     |             |            |              |              |                |           |
| Gtpbp1        | GTP binding protein 1                                     | AV239949    | 7     |           | 1.76        |            |              |              |                | -1.73     |
| Hba-a1        | hemoglobin alpha, adult chain 1                           | AV003378    | 1     | -1.7      |             |            |              |              |                | -1.54     |
| Hba-a1        | hemoglobin alpha, adult chain 1                           | V00714      | 6     | -1.62     |             | -1.62      | -1.64        |              |                | -1.67     |
| Hbb-b1        | hemoglobin, beta adult major chain                        | J00413      | 4     |           |             | -1.59      | -1.73        |              |                | -1.57     |
| Hbb-b1        | hemoglobin, beta adult major chain                        | V00722      | 6     | -1.73     |             | -1.89      | -1.67        |              |                | -2.13     |
| LOC215751     | similar to hypothetical protein BC014320                  | AI845588    | 3     |           |             | -3.04      |              |              |                |           |



| Gene Name       | Gene Description                                    | Accession # | Class | WY, WT | WY, Null | AGN, WT | AGN, Null | T1317, WT | T1317, Null | Con, Null |
|-----------------|-----------------------------------------------------|-------------|-------|--------|----------|---------|-----------|-----------|-------------|-----------|
| LOC216820       | similar to DKFZP566O084 protein                     | AI843399    | 1     | 1.62   |          |         |           |           |             |           |
| Lpin1           | lipin 1                                             | AI846934    | 5     |        |          |         | -2.44     |           |             |           |
| Lyzs            | lysozyme                                            | M21050      | 3     |        |          | -4.77   |           |           |             |           |
| Lzp-s           | P lysozyme structural                               | X51547      | 8     |        | -4       |         | -4.77     |           |             |           |
| Nifie14-pending | seven transmembrane domain protein                  | AI843521    | 1     | 1.65   |          |         |           |           |             |           |
| Noc4            | neighbor of Cox4                                    | AW047276    | 1     | 1.78   |          |         |           |           |             |           |
| ORF11           | open reading frame 11                               | AI842705    | 4     |        |          | 1.56    | 1.72      |           |             |           |
| Ovcov1          | ovarian cancer overexpressed 1                      | AV050648    | 7     |        | 1.58     |         |           |           |             |           |
| Phlda1          | pleckstrin homology-like domain, family A, member 1 | U44088      | 2     | 2.95   | -3.45    | 2.96    |           |           |             |           |
| Reln            | reelin                                              | U24703      | 5     |        |          |         | -1.97     |           |             |           |
| Rtn4            | reticulon 4                                         | AI840118    | 1     | 1.98   |          |         |           |           |             | -2.64     |
| S100a13         | S100 calcium binding protein A13                    | AV007820    | 7     |        | -9.1     |         |           |           |             |           |
| Sca10           | spinocerebellar ataxia 10 homolog (human)           | X61506      | 1     | 1.88   |          |         |           |           |             |           |
| Selenbp1        | selenium binding protein 1                          | M32032      | 3     |        |          | 1.5     |           |           |             |           |
| Serp1-pending   | stress-associated endoplasmic reticulum protein 1   | AI843466    | 3     |        |          | -1.52   |           | -1.71     |             |           |
| Tm4sf7          | transmembrane 4 superfamily member 7                | AW124470    | 1     | -2.28  |          |         |           |           |             |           |
| Txnip           | thioredoxin interacting protein                     | AI839138    | 1     | -2.13  |          |         |           |           |             |           |
| Vamp8           | vesicle-associated membrane protein 8               | AF053724    | 7     |        | -2       |         |           |           |             | 1.85      |
| Vnn3            | vanin 3                                             | AJ132103    | 2     | 1.82   |          | 1.77    |           | 2.04      |             |           |
| Wdr5            | WD repeat domain 5                                  | AI463460    | 7     |        | 2        |         |           |           |             |           |

<sup>a</sup>Gene name, gene description, and accession # are from Affymetrix (Aug. 1, 2003).

<sup>b</sup>Refers to type of regulation by WY and AGN in wild-type and PPAR $\alpha$ -null mice. See text for details.

<sup>c</sup>Treatment groups: WY, WT – treatment with WY for 3 days in wild-type mice normalized to control treated wild-type mice. WY, Null – treatment with WY for 3 days in PPAR $\alpha$ -null mice normalized to control treated PPAR $\alpha$ -null mice. AGN, WT – treatment with AGN 190204 for 3 days in wild-type mice normalized to control treated wild-type mice. AGN, Null – treatment with AGN for 3 days in PPAR $\alpha$ -null mice normalized to control treated PPAR $\alpha$ -null mice. T1317, WT – treatment with T0901317 for 7 days in wild-type mice normalized to control treated wild-type mice. T1317, Null – treatment with T0901317 for 7 days in LXR $\alpha$ /LXR $\beta$ -null mice normalized to control treated LXR $\alpha$ /LXR $\beta$ -null mice. CON, Null – control treated PPAR $\alpha$ -null mice normalized to control treated wild-type mice.

<sup>d</sup>Numbers are in fold-changes.
